# Supplementary material for: An ideal detector composed of a 3D Gd-based coordination polymer for DNA and Hg2+ ion
Source: Royal Society of Chemistry journal article supplement (doi:10.1039/c5qi00252d), 2015-12-24
Supplement: c5qi00252d1.pdf [file c5qi00252d1.pdf]

## ***Supporting Information***

### **An ideal detector composed of a 3D Gd-based coordination ploymer for DNA and Hg<sup>2+</sup> ion**

Shu-Na Zhao,<sup>a,b</sup> Lan-Lan Wu,<sup>a,b</sup> Jing Feng,<sup>a</sup> Shu-Yan Song,<sup>\*a</sup> and Hong-Jie Zhang<sup>\*a</sup>

<sup>a</sup>State Key Laboratory of Rare Earth Resource Utilization, Changchun Institute of Applied Chemistry, Chinese Academy of Sciences, 5625 Renmin Street, Changchun, 130022 (P.R. China)

<sup>b</sup>University of Chinese Academy of Sciences, Beijing, 100049 (P.R. China)

\*Corresponding author

Email: [songsy@ciac.ac.cn](mailto:songsy@ciac.ac.cn) (Shu-Yan Song); [hongjie@ciac.ac.cn](mailto:hongjie@ciac.ac.cn) (Hong-Jie Zhang)

Tel: 86-431-85262127.

Fax: 86-431-85698041.

**Table S1.** Crystal data and structure refinements of compound GdL

| Compound                                                                                                                                                | GdL                                                            |
|---------------------------------------------------------------------------------------------------------------------------------------------------------|----------------------------------------------------------------|
| formula                                                                                                                                                 | GdC <sub>11</sub> H <sub>6</sub> N <sub>3</sub> O <sub>6</sub> |
| fw                                                                                                                                                      | 433.44                                                         |
| <i>T</i> /K                                                                                                                                             | 296(2)                                                         |
| $\lambda$ (Mo K $\alpha$ ), Å                                                                                                                           | 0.71073                                                        |
| cryst syst                                                                                                                                              | monoclinic                                                     |
| space group                                                                                                                                             | <i>P</i> 2 <sub>1</sub> / <i>n</i>                             |
| <i>a</i> (Å)                                                                                                                                            | 7.7512(12)                                                     |
| <i>b</i> (Å)                                                                                                                                            | 8.0176(13)                                                     |
| <i>c</i> (Å)                                                                                                                                            | 18.399(3)                                                      |
| $\alpha$ (deg)                                                                                                                                          | 90                                                             |
| $\beta$ (deg)                                                                                                                                           | 96.125(2)                                                      |
| $\gamma$ (deg)                                                                                                                                          | 90                                                             |
| <i>V</i> /Å <sup>3</sup>                                                                                                                                | 1136.9(3)                                                      |
| <i>Z</i>                                                                                                                                                | 4                                                              |
| <i>D</i> <sub>calcd.</sub> (g·cm <sup>-3</sup> )                                                                                                        | 2.532                                                          |
| <i>F</i> (000)                                                                                                                                          | 820                                                            |
| 2 $\theta$ <sub>max</sub> (°)                                                                                                                           | 50.18                                                          |
| GOF                                                                                                                                                     | 1.035                                                          |
| <i>R</i> <sub>I</sub> ( <i>I</i> > 2 $\sigma$ ( <i>I</i> )) <sup>a</sup>                                                                                | 0.0258                                                         |
| <i>wR</i> <sub>2</sub> <sup>b</sup> (all data)                                                                                                          | 0.0526                                                         |
| <sup>a</sup> <i>R</i> <sub>1</sub> = $\Sigma  F_o  -  F_c  /\Sigma F_o $ , <i>wR</i> <sub>2</sub> = $[\Sigma( F_o ^2 -  F_c ^2)/\Sigma F_o ^2]^{1/2}$ . |                                                                |

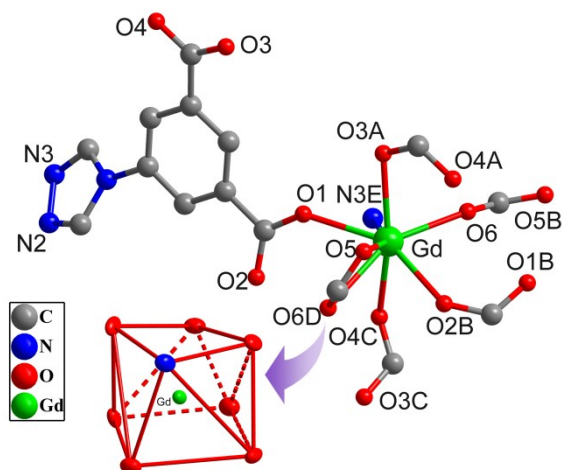

**Fig. S1** Local coordination environment of the GdIII ions in GdL. Hydrogenatoms attached to carbon atoms are omitted for clarity. Symmetry codes: A:-x, -y, -z; B:0.5-x, 0.5+y, 0.5-z; C:0.5+x, -0.5-y, 0.5+z; D:0.5-x, -0.5+y, 0.5-z; E:1-x, -1-y, -z.

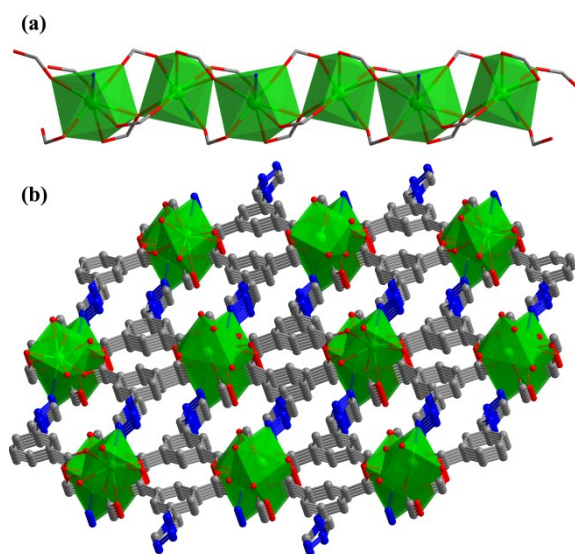

**Fig. S2** (a) Infinite 1D chains; (b) The 3D framework of GdL.

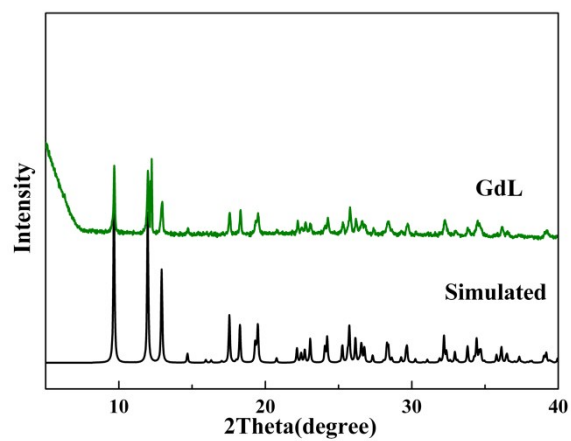

**Fig. S3** Power X-ray diffraction pattern of simulated and experimental as-synthesized compound GdL.

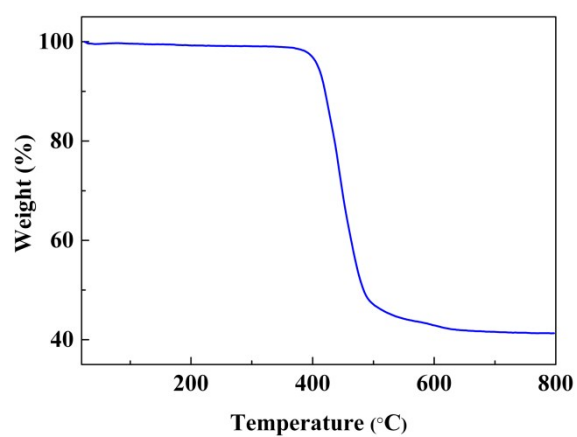

**Fig. S4** TGA curve of compounds GdL.

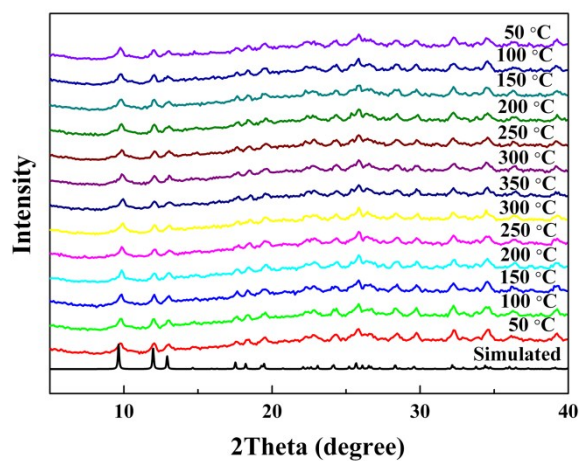

**Fig. S5** Power X-ray diffraction pattern of simulated and experimental as-synthesized compound GdL from 50 °C to 350 °C, then from 350 °C to 50 °C.

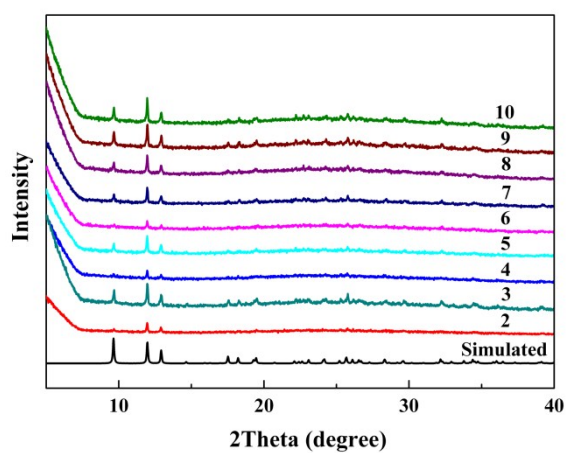

**Fig. S6** Power X-ray diffraction pattern of compound GdL after being immersed in the solution of pH = 2-10 for two weeks.

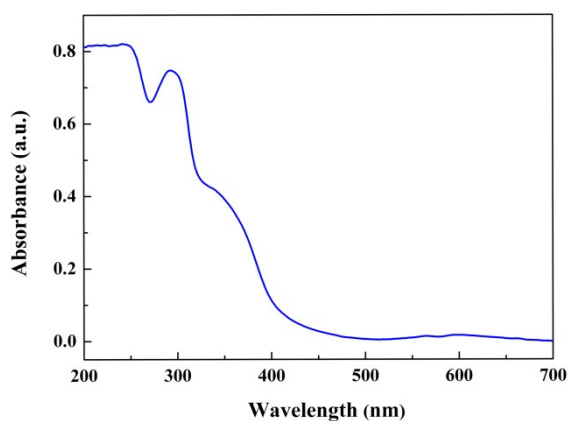

**Fig. S7** The UV-Vis diffuse reflectance spectra (DRS) of GdL.

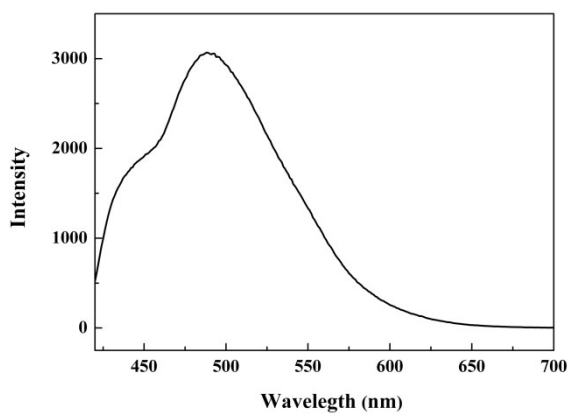

**Fig. S8** Room-temperature emission spectra for GdL in the solid state excited at 405

nm.

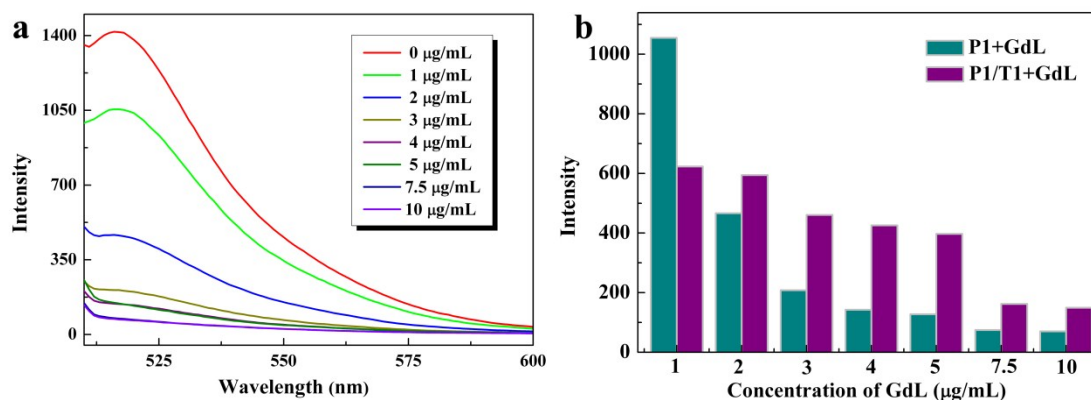

**Fig. S9** (a) Fluorescence emission spectra of P1 in Tris-HCl buffer in the presence of different concentrations of GdL (from top to bottom: 0, 1, 2, 3, 4, 5, 7.5 and 10  $\mu\text{g/mL}$ ); (b) Influence of the amount of GdL (green column) or T1 (violet column) on the fluorescence quenching efficiency. (P1: 50 nM; T1: 50 nM; pH: 7.4 in the Tris-HCl buffer)

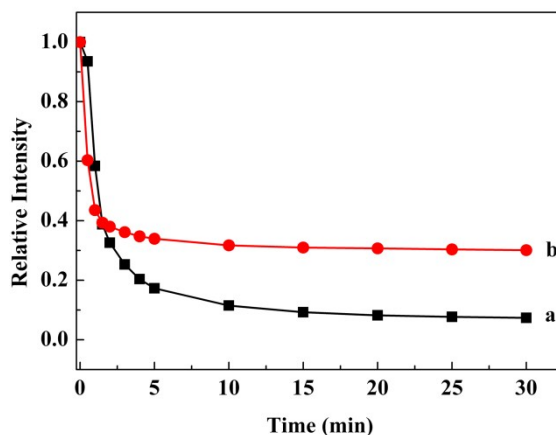

**Fig. S10** The fluorescence quenching curves for P1 (50 nM)/MOF (5  $\mu\text{g/mL}$ ) composite as a function of time (a) in the absence of T1 and (b) in the presence of T1 of 50 nM. The excitation and emission wavelengths are 494 and 517 nm.

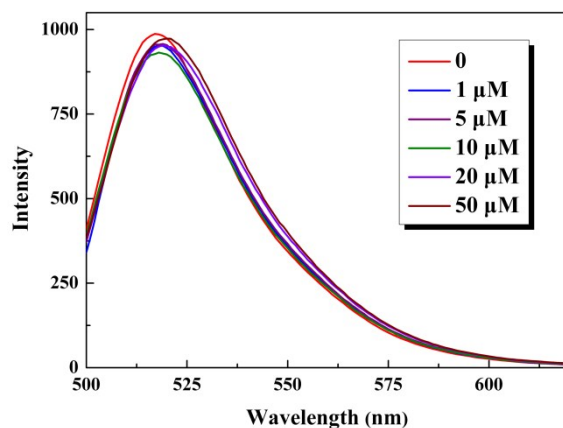

**Fig. S11** The fluorescence emission spectrum of P2 in the presence of  $\text{Hg}^{2+}$  from 0 to 50.0  $\mu\text{M}$  in Tris-HCl buffer. Excitation was at 480 nm.

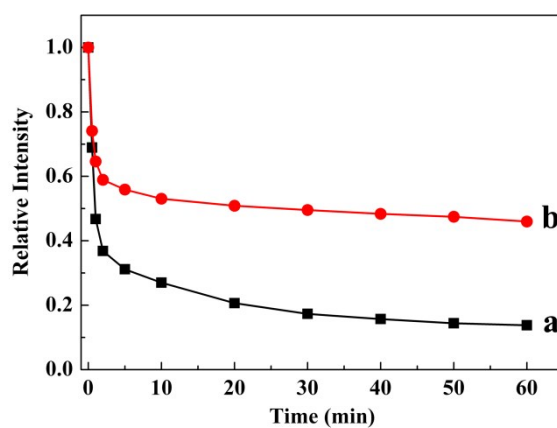

**Fig. S12** The fluorescence quenching curves for P2 (100 nM)/MOF (20  $\mu\text{g/mL}$ ) composite as a function of time (a) in the absence of  $\text{Hg}^{2+}$  and (b) in the presence of  $\text{Hg}^{2+}$  of 10  $\mu\text{M}$ . The excitation and emission wavelengths are 480 and 517 nm.

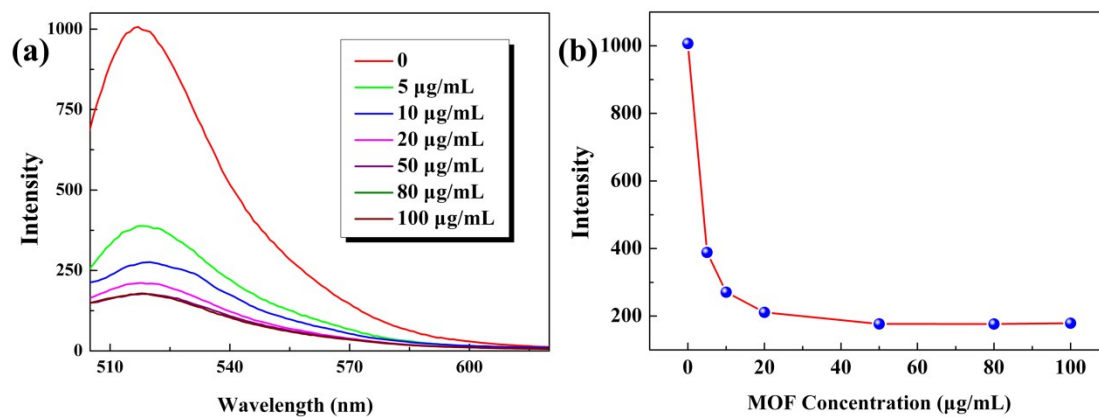

**Fig. S13** (a) Fluorescence emission spectra of P2 in Tris-HCl buffer in the presence of

different concentration of GdL (from top to bottom: 0, 5, 10, 20, 50, 80 and 100  $\mu\text{g/mL}$ ); (b) the corresponding fluorescence intensity at 517 nm wavelength plotted against GdL concentration. Excitation was at 480 nm and fluorescence intensity was recorded at 517 nm.

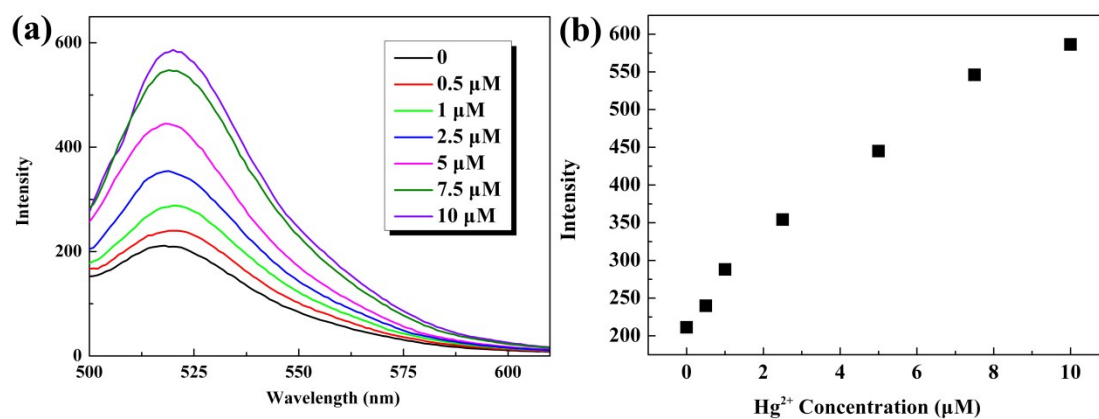

**Fig. S14** (a) Fluorescence spectra of P2/GdL in the presence of different concentrations of  $\text{Hg}^{2+}$  in Tris-HCl buffer ( $\text{pH} = 7.4$ ) (from bottom to top: 0, 0.5, 1, 2.5, 5, 7.5, and 10  $\mu\text{M}$ ). Excitation was at 480 nm and emission intensity was recorded at 517 nm; (b) the corresponding fluorescence intensity plotted against  $\text{Hg}^{2+}$  concentration.
